# Supplementary material for: Extraction, Purification and In Vitro Antioxidant Activity Evaluation of Phenolic Compounds in California Olive Pomace
Source: MDPI journal article supplement (doi:10.3390/foods11020174), 2022-01-10
Supplement: s1 [file s1]

Supplementary

# Extraction, Purification, and in vitro Antioxidant Activity Evaluation of Phenolic Compounds in California Olive Pomace

Hefei Zhao<sup>1</sup>, Roberto J. Avena-Bustillos<sup>2</sup>, Selina C. Wang<sup>1,3</sup>\*

<sup>1</sup> Department of Food Science and Technology, University of California, Davis, CA 95616, USA

<sup>2</sup> Western Regional Research Center, Healthy Processed Foods Research, Albany, CA, USA

<sup>3</sup> Olive Center, University of California, Davis, CA 95616, USA

\* Correspondence: [scwang@ucdavis.edu](mailto:scwang@ucdavis.edu)

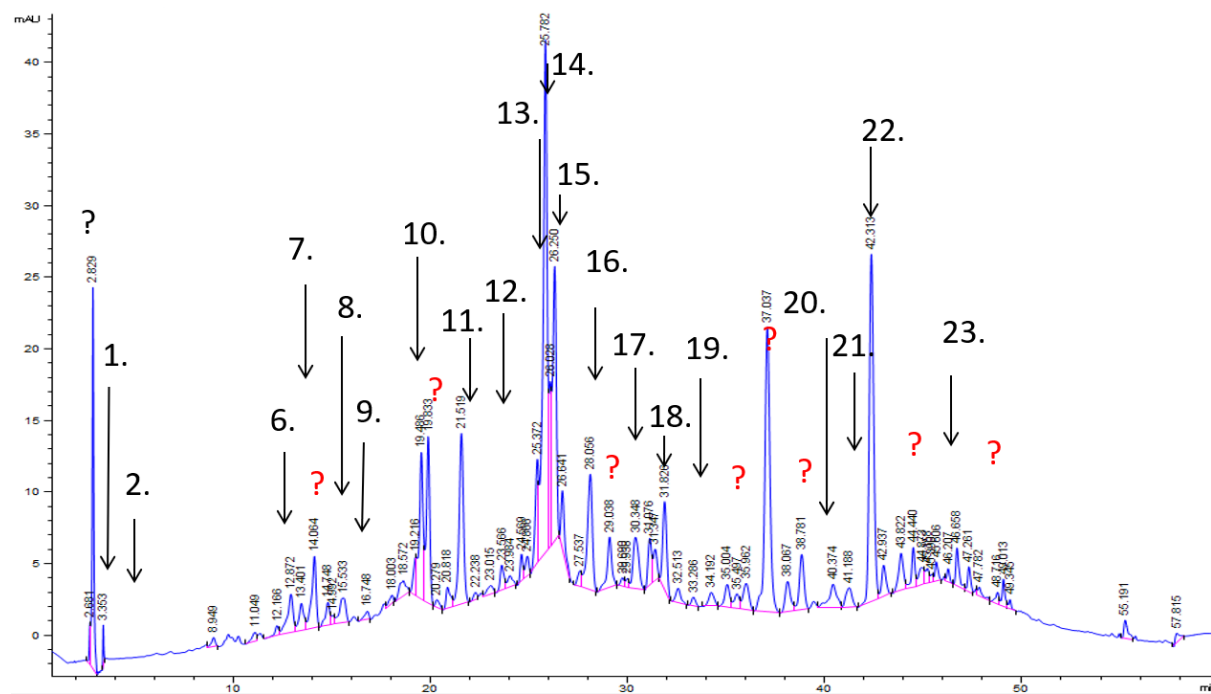

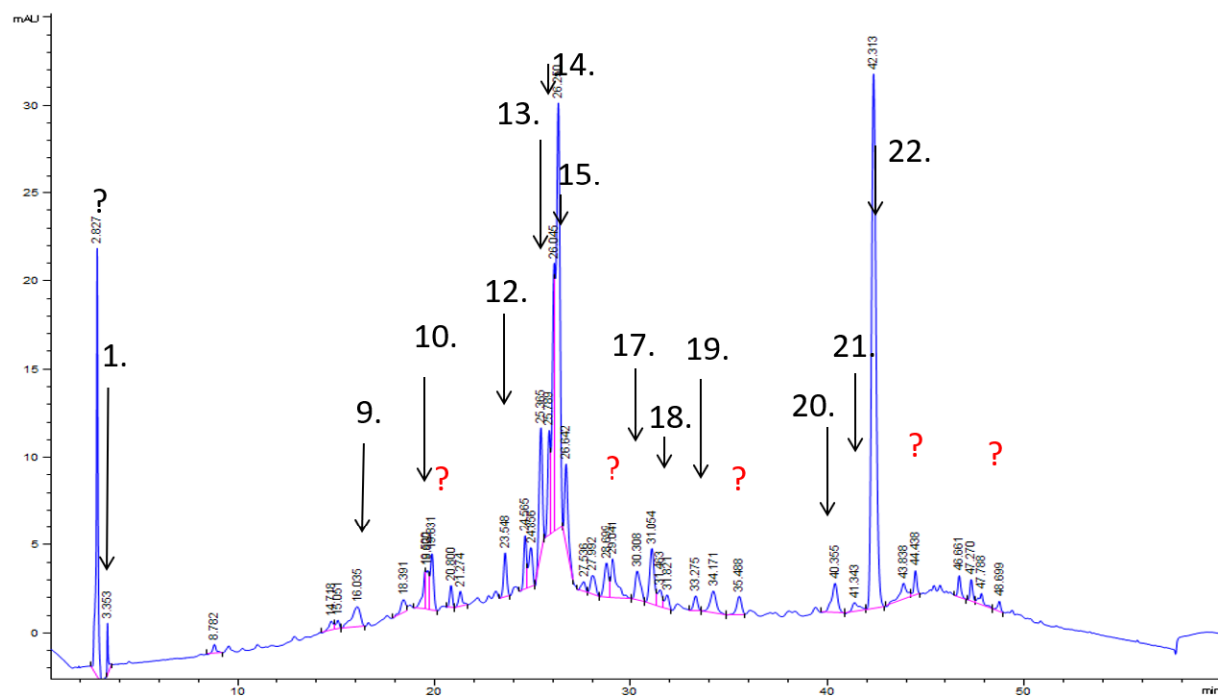

(b)

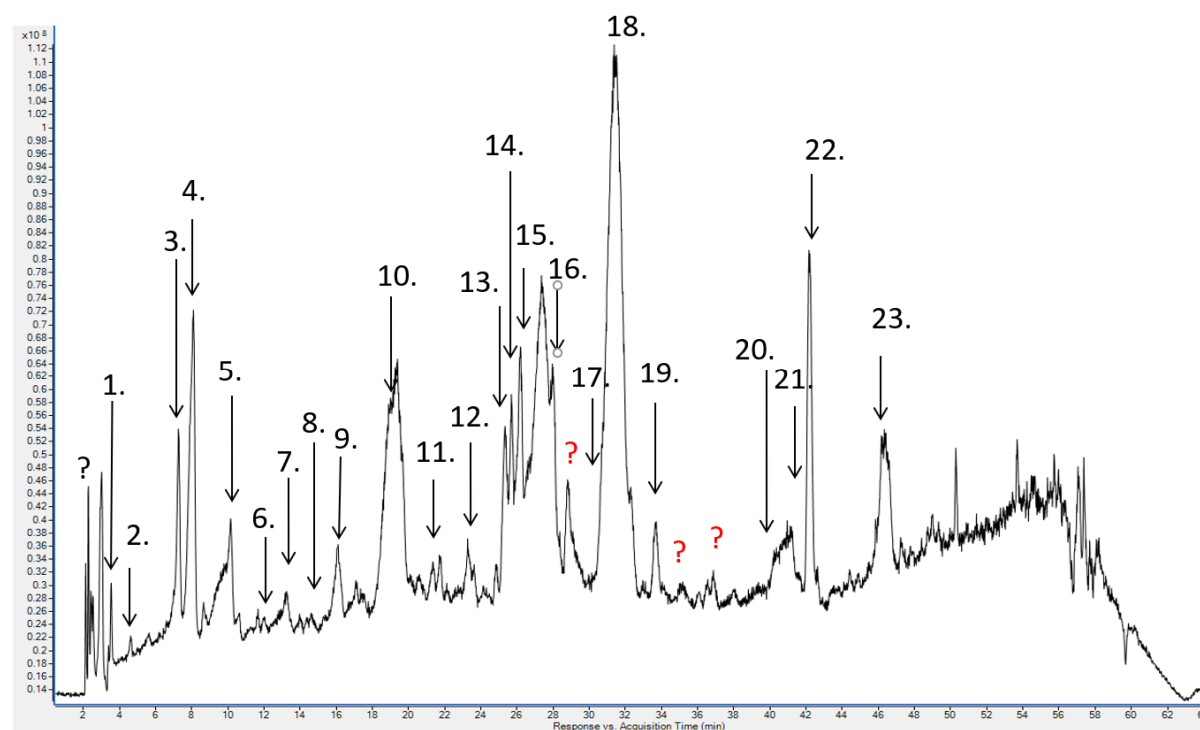

(C)

**Figure S1.** Chromatography of XAD7HP resin purified freeze-dried powder (a) at 320 and (b) at 365 nm and (c) total ion chromatogram (TIC).
